# Supplementary material
Source: Springer Nature journal article supplement (https://www.springermedizin.de/resource/supplementary/13075_2011_3138_MOESM3_ESM.pdf/9693876)

**A**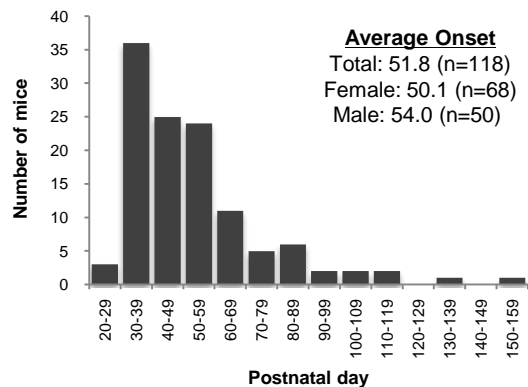**B**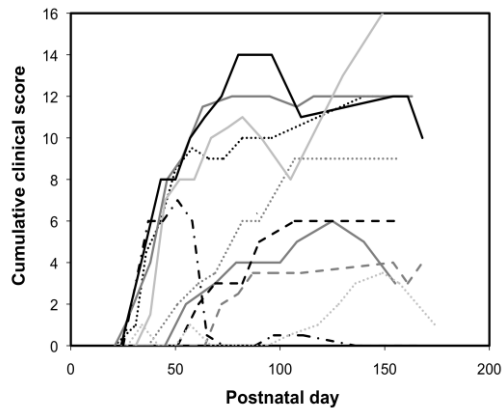**C**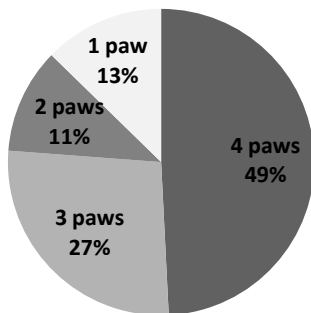**D**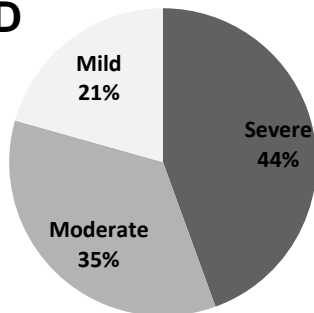**E**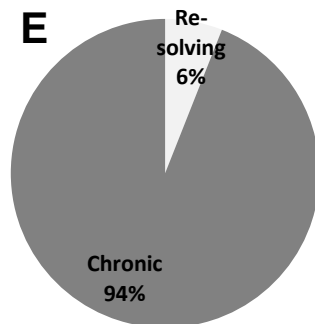

Supplement: MOESM3 [file 9693876]
